# Supplementary material for: Imbalanced IL-1B and IL-18 Expression in Sézary Syndrome
Source: MDPI journal article supplement (doi:10.3390/ijms24054674), 2023-02-28
Supplement: s1 [file s1]

Supplementary material

| Supplementary Table S1. Sequences of the primers used for qRT-PCR |                              |                              |
|-------------------------------------------------------------------|------------------------------|------------------------------|
| Gene                                                              | Forward sequence             | Reverse sequence             |
| <i>NLRP1</i>                                                      | 5'AAGACCAGCTGTTCTCGGAGTT3'   | 5'AGGCATGAGATCTCCTGGTTTC3'   |
| <i>NLRP3</i>                                                      | 5'TGGAGTGTCGGAGAAGAG3'       | 5'TGCTGTCATTGTCCTGGTGT3'     |
| <i>NLRP4</i>                                                      | 5'GAACTACGGCTGGACTCTTTT3'    | 5'AGCAAAGACATGTGGCGGAA3'     |
| <i>AIM-2</i>                                                      | 5'CACCAAAAAGTCTCTCCTCATGTT3' | 5'AAACCCTTCTCTGATAGATTCCTG3' |
| <i>IL18</i>                                                       | 5'GACGCATGCCCTCAATCC3'       | 5'CTAGAGCGCAATGGTGCAATC3'    |
| <i>IL1B</i>                                                       | 5'TCCCCAGCCCTTTTGTTGA3'      | 5'TTAGAACCAAATGTGGCCGTG3'    |
| <i>CARD8</i>                                                      | 5'CAGTGTCCAAGCAACAAGCC3'     | 5'TACTGGATCCACTGTCCCGT3'     |
| <i>GAPDH</i>                                                      | 5'GAAGGTGAAGGTCGGAGT3'       | 5'GAAGATGGTGATGGGATTTC 3'    |

**Supplementary Table S2. Subjects characteristics**

| Patient SS | Gender  | Age        | Lymphocytes | CD4+ | CD4+CD26-   | CD4+CD7-    | CD8+ | CD4/CD8 | Skin biopsy* | Serum | PBMC | LN biopsy* |
|------------|---------|------------|-------------|------|-------------|-------------|------|---------|--------------|-------|------|------------|
| SS1        | F       | 36         | 3620        | 2908 | 1192 (41)   | 930 (32)    | 263  | 11      | -            | X     | -    | -          |
| SS2        | M       | 62         | 6870        | 6270 | 3762 (60)   | 2696 (43)   | 452  | 11      | -            | X     | -    | X          |
| SS3        | M       | 58         | 5687        | 4866 | 2335 (48)   | 1557 (37)   | 422  | 9       | -            | X     | -    | -          |
| SS4        | F       | 69         | 4730        | 4209 | 2946 (70)   | 2147 (51)   | 94   | 44      | X            | X     | -    | X          |
| SS5        | M       | 62         | 2100        | 1008 | 332 (33)    | 63 (3)      | 504  | 4       | -            | X     | X    | -          |
| SS6        | F       | 81         | 2280        | 1940 | 1105 (57)   | 427 (22)    | 161  | 12      | X            | -     | -    | X          |
| SS7        | M       | 53         | 1430        | 600  | 540 (9)     | 222 (37)    | 328  | 2       | X            | -     | -    | X          |
| SS8        | F       | 76         | 1160        | 916  | 540 (59)    | 183 (20)    | 81   | 11      | X            | -     | -    | -          |
| SS9        | M       | 57         | 3490        | 3176 | 2350 (74)   | 2604 (82)   | 174  | 18      | -            | X     | -    | X          |
| SS10       | M       | 62         | 8670        | 8150 | 4238 (52)   | 3341 (41)   | 347  | 23      | -            | X     | X    | -          |
| SS11       | F       | 60         | 131010      | 5767 | 120736 (96) | 120736 (96) | 5240 | 24      | X            | -     | X    | -          |
| SS12       | M       | 48         | 21430       | 0572 | 4526 (22)   | 4114 (2)    | 428  | 50      | -            | X     | -    | -          |
| SS13       | M       | 68         | 6830        | 6251 | 5376 (86)   | 5063 (81)   | 295  | 21      | X            | -     | -    | -          |
| SS14       | F       | 53         | 3090        | 2472 | 1508 (61)   | 490 (2)     | 247  | 10      | X            | X     | X    | -          |
| SS15       | M       | 58         | 7640        | 6647 | 5251 (79)   | 1994 (30)   | 289  | 23      | -            | X     | -    | -          |
| SS16       | F       | 61         | 2030        | 2030 | 1705 (84)   | 1218 (60)   | 182  | 11      | -            | X     | -    | -          |
| SS17       | M       | 48         | 7640        | 6647 | 5251 (79)   | 2791 (42)   | 153  | 43      | X            | -     | -    | -          |
| SS18       | F       | 70         | 7370        | 6706 | 5968 (89)   | 4158 (62)   | 147  | 45      | X            | X     | X    | -          |
| SS19       | F       | 69         | 3260        | 2543 | 2060 (81)   | 585 (23)    | 242  | 10      | X            | X     | X    | X          |
| SS20       | M       | 55         | 2240        | 1705 | 290 (17)    | 937 (55)    | 313  | 6       | X            | X     | -    | X          |
| SS21       | F       | 65         | 3700        | 3293 | 2700 (82)   | 231 (7)     | 148  | 22      | X            | X     | X    | X          |
| SS22       | M       | 84         | 2610        | 2531 | 2453 (94)   | 760 (30)    | 224  | 11      | X            | X     | X    | X          |
| SS23       | M       | 70         | 2200        | 2068 | 1861 (90)   | 827 (40)    | 66   | 31      | X            | X     | X    | -          |
| SS24       | F       | 43         | 5690        | 4840 | 4210 (87)   | 2904 (60)   | 178  | 27      | -            | X     | -    | -          |
| SS25       | M       | 61         | 2250        | 1786 | 1327 (59)   | 1417 (63)   | 98   | 18      | X            | X     | X    | X          |
| SS26       | F       | 40         | 3780        | 3080 | 215 (7)     | 92 (3)      | 296  | 10      | -            | -     | X    | -          |
| SS27       | M       | 62         | 2700        | 2200 | 1980 (90)   | 880(40)     | 180  | 12      | -            | -     | -    | X          |
| SS28       | M       | 28         | 1430        | 600  | 540 (9)     | 222 (37)    | 328  | 2       | -            | -     | -    | X          |
| HD:40      | 18M/22F | 54 (30-85) | ND          | ND   | ND          | ND          | ND   | ND      | 12           | 23    | 8    | ND         |
| IE:19      | 13M/6F  | 65 (32-77) | ND          | ND   | ND          | ND          | ND   | ND      | 12           | ND    | ND   | 8          |

F= female, M= male; ND= not done; LN= lymph node; \*included in the immunohistochemistry analysis;

Reference value for: Lymph (1000-3200/mm<sup>3</sup>); CD4+ (900-3400/mm<sup>3</sup>); CD4+CD26 (>40%); CD4+CD7- ( >30%.); CD8+(300-1000/mm<sup>3</sup>); CD4/CD8 ratio (>10%);

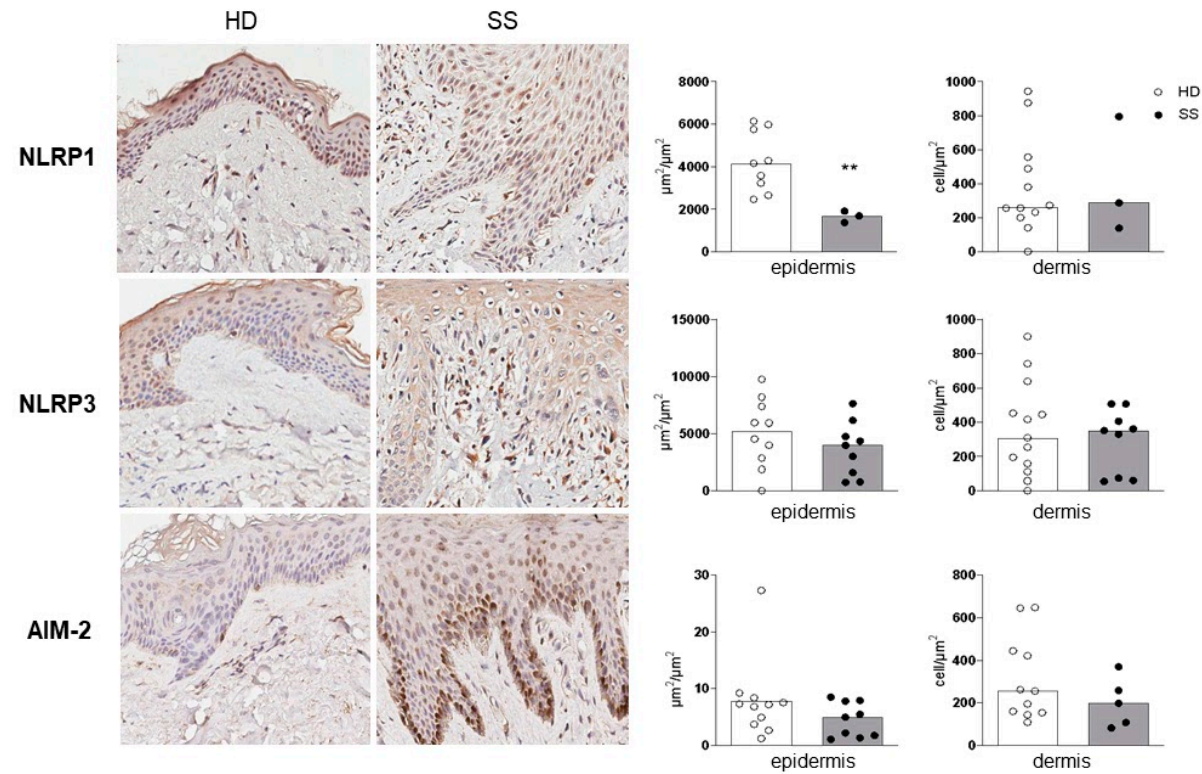

Supplementary Figure S1. Expression of NLRP1, NLRP3 and AIM2 in the skin of SS patients. Expression of NLRP1, NLRP3 and AIM2 were assessed in the skin biopsies of SS patients (n = 3-9, closed circle), healthy individuals (n = 9-13 open circle) by immunohistochemistry. Analyses were performed in the epidermis and dermis. Values are expressed as median. \*\* $p \leq 0.01$  compared to HD group.

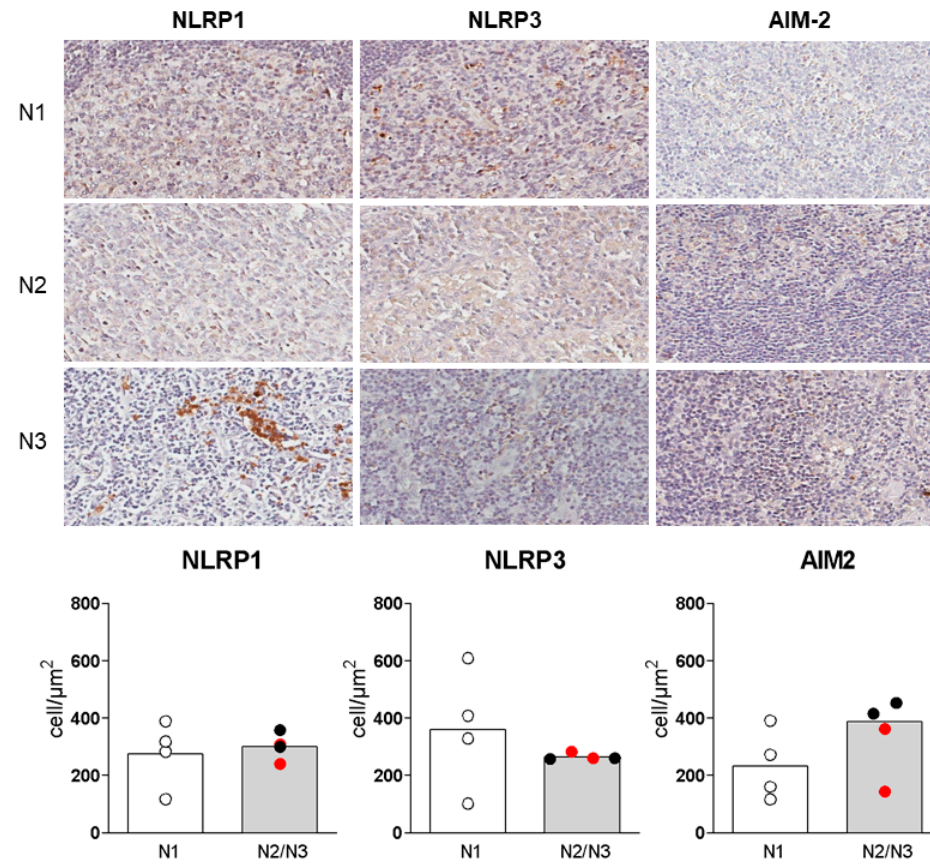

Supplementary Figure S2. Expression of NLRP1, NLRP3 and AIM2 in lymph nodes of SS patients. Expression of NLRP1, NLRP3 and AIM2 were assessed in the lymph nodes biopsies of SS patients at stages N1 (n = 4, open circle), N2 (n = 2, pink circle) N3 (n = 2, closed circle) by immunohistochemistry.

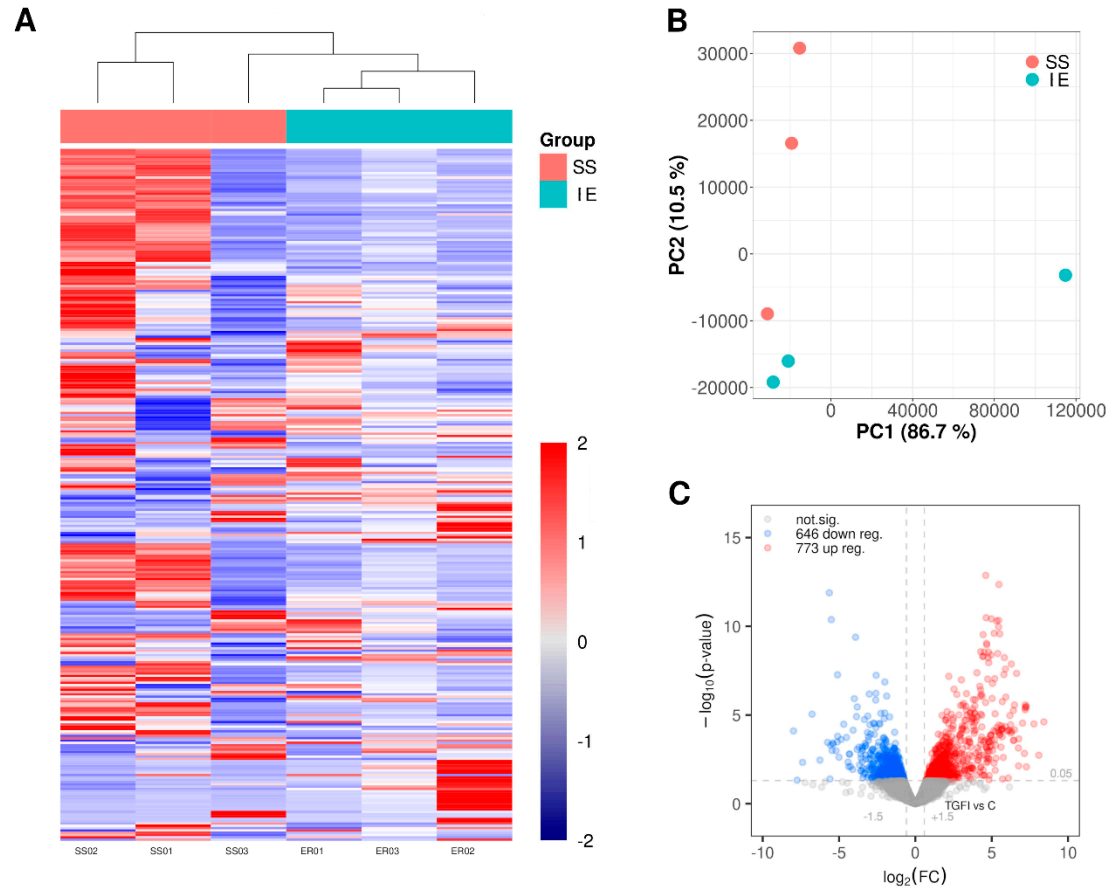

Supplementary Figure S3. Transcriptomic analyses of lymph nodes of SS. A) Unsupervised z-score heatmap of normalized counts of the 300 most variable and expressed genes. The IE group is colored in cyan and the SS group is in pink. Red shades mean expression above the row average, and blue shades means below the average expression. B) Explained variance projection on to the two largest orthogonal principal components. C) Volcano plot of  $-\log_{10}(\text{p-value})$  as function of  $\log_2(\text{FC})$ . Upregulated genes are represented by red cycles and downregulated genes are represented by blue cycles. Gray cycles represent not-significant altered genes. Vertical dashed lines represent absolute FC values limits of 1.5 and the horizontal dashed line represents p-value significance level of 0.05.

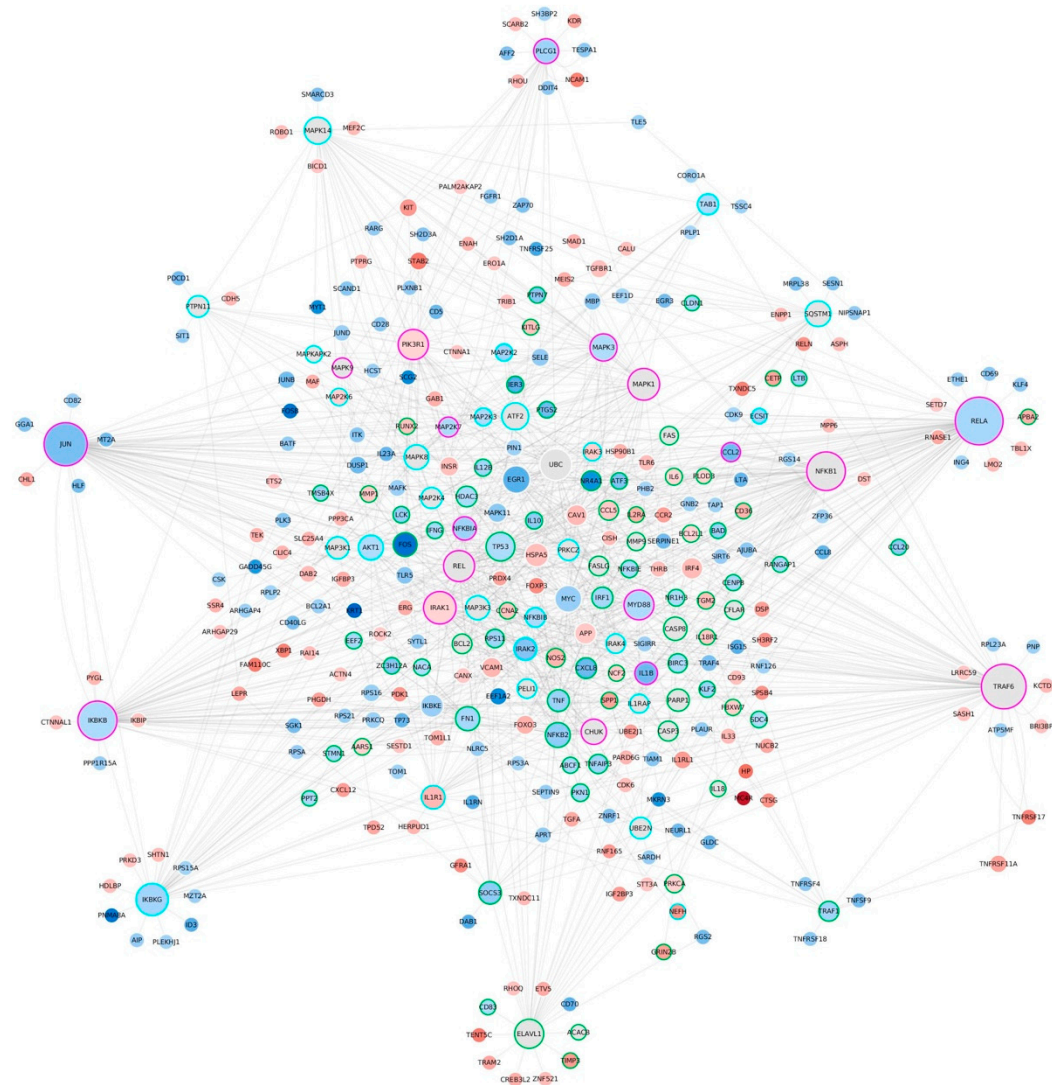

Supplementary Figure S4. Network of the IL-1 $\beta$  and IL-18 signaling pathways genes. Each circle in the network represents a gene. Genes colored in shades of red have  $FC \geq 1.3$ , while genes colored in shades of blue have  $FC \leq -1.3$ , in both cases, regardless of the p-value. Circles with a cyan border represent IL1-beta activation signaling pathway genes from the Wikipathway molecular pathways database. Green borders, representing genes participating in the IL18 activation pathway; and genes with the magenta border act in both pathways. The size of each circle is proportional to the number of genes it connects to.
